# Supplementary material for: Social Practice and Shared History, Not Social Scale, Structure Cross‐Cultural Complexity in Kinship Systems
Source: PubMed Central journal article supplement — Top Cogn Sci. 2019 Jun 4;12(2):744–65. doi: 10.1111/tops.12430 (PMC7318210; doi:10.1111/tops.12430), 2019-06-04
Supplement: TOPS-12-744-s001.pdf [file TOPS-12-744-s001.pdf]

# Social practice and shared history, not social scale, structure cross-cultural complexity in kinship systems

Péter Rácz<sup>1,2</sup>, Sam Passmore<sup>2</sup>, and Fiona M. Jordan<sup>2</sup>

<sup>1</sup>Cognitive Development Center,

Central European University

<sup>2</sup>Evolution of Cross-Cultural Diversity Lab,

Department of Anthropology and Archaeology,

University of Bristol

Please address correspondence to Péter Rácz  
Cognitive Development Center,  
Central European University  
([raczp@ceu.edu](mailto:raczp@ceu.edu))

***Keywords***— kinship terminology, social cognition, semantics, cross-cultural analysis, cultural evolution

Word count: 7735. Excluding references: 6449

## Abstract

Human populations display remarkable diversity in language and culture, but the variation is not without limit. At the population level, variation between societies may be structured by a range of macro-evolutionary factors including ecological and environmental resources, shared ancestry, spatial proximity, and co-varying social practices. Kinship terminology systems are varying linguistic paradigms that denote familial social relationships of kin and non-kin. Systems vary by the kinds of salient distinctions that are made (e.g. age, gender, generation) and the extent to which different kinds of kin are called by the same term. Here, we explore two kinds of explanations for an observed typology of kin terms for cousins. The first one derives the typology from a learning bottleneck linked to population size. This would lead to a correlation between community size and the type of kinship system. The second one derives it from a set of social practices, particularly marriage and transfer of resources, that might shape kinship systems. Using a global ethnographic database of over a thousand societies we show that marriage rules and shared linguistic affiliation have a significant influence on the type of kinship system found in a society. This remains true if we control for the effect of spatial proximity and cultural ancestry. By combining cognitive and historic approaches to this aspect of kinship, we suggest broader implications for the study of human social cognition in general.

# 1 Background

Social and cultural systems of meaning – such as grammatical categories, marriageable partners, the classifications of the natural world, and religious beliefs – all vary across cultures. While these systems are the products of generations of individuals interacting, they also partly reflect the possibilities of the human mind.

Anthropologists have long recognised the adaptive diversity of human behaviour and cognition, and the importance and challenge of incorporating the facts of diversity is now an invigorated concern within the cognitive sciences (Evans, 2010; Henrich et al., 2010; Song et al., 2009). Investigations in domains such as colour, space, and the body reveal that perception and expression of conceptual categories varies cross-culturally (e.g. Malt and Majid 2013). At the same time, there are systematic cross-cultural regularities in category structures which may relate to shared human physiology of perception (for example in colour categories, see Regier and Kay 2009). Furthermore, for some domains, cross-cultural variation in categories can be limited by the need for social coordination between individuals (Boyd et al., 1997). Cognitive constraints may also influence the extent to which any categorical system is free to vary (Kemp and Regier, 2012). A strong case can also be made for the mediating effect of cultural evolutionary processes on category formation. These include shared ancestry of language and culture, processes of diffusion and contact (Dunn et al., 2011; Levinson, 2012), as well as co-dependencies between cultural categories and aspects of social and ecological environments (Botero et al., 2014).

A long-standing focus in cognitive anthropology has been the semantic system of *kinship*: how different cultural groups classify family members using language. In this paper we explore the interaction of culture and cognition by examining the effects of various cultural characteristics on the structure of kinship terminology systems in a large cross-cultural sample.

A core example of cognitive effects on cultural evolution comes from recent work which has pointed to the role of speaker group size in shaping linguistic interaction, and, in turn, the complexity of grammar and vocabulary in language (see e.g. Nettle 2012). These results indicate that languages spoken by large groups will have larger vocabularies of content words (like verbs and nouns) and less complexity in their morphology (so that fewer function-form pairings of the same word exist). If we can arrange kinship systems along some particular axis of *complexity*, we have predictions on its correlation with the size of the speaker group.

Alternatively, measures of kinship vocabulary complexity may also be shaped by social practice. The complexity of a kinship system is shaped by its roles as a symbolic system interacting with how practices of family and marriage are organised in a society. These practices, and their instantiation in the meanings of words, may then be largely

39 constrained by shared history as language is transmitted over time.

40 There is evidence for both group size and social practice affecting language in general  
41 and social practice affecting kinship terminology in particular. Our paper breaks new  
42 ground in that it compares the effects of group size and social practice on kinship ter-  
43 minology. We intend to demonstrate how a complete understanding of the micro-level  
44 cognitive processes underlying any semantic category system must also be examined in the  
45 macro-level context of cultural history. Some of our cognitive capacities or 'gadgets' may  
46 themselves be products of cultural evolution (Heyes, 2018). Similarly, we propose that  
47 the adaptive landscape of human social diversity constrains the kinds of social learning  
48 our cognitive mechanisms should be equipped to deal with.

## 49 **1.1 The semantic typology of kinship variation**

50 A kinship terminology system is a cognitive and social category system that is used by  
51 speakers of a language to refer to, group together, and distinguish, family members.  
52 These terminology sets (here, 'kinship systems') vary cross-linguistically in structured  
53 and constrained ways (Murdock, 1949). Attested kinship systems show parallels with  
54 other category systems like colour terms; they reflect cognitive pressures in displaying  
55 a trade-off between simplicity and the ability to discriminate. Multiple relatives can  
56 be grouped together under one term: for example, an English 'aunt' can refer to one's  
57 mother's or father's sister. Globally, these extension patterns cover no more than a small  
58 space of all possible arrangements (Kemp and Regier, 2012): no language uses the same  
59 word to exclusively refer to all one's grandparents and all one's younger siblings.

60 Typological systems that categorise kinship terminology according to some axes of  
61 variation were first named by Morgan (1871). Morgan's typology focusses on the ways in  
62 which relatives in own's own (one) generation were named. The systems that he identified,  
63 and that Murdock (1949) (p 67.) later formalised, are attached to then contemporary  
64 ethnonyms of paradigm anthropological example communities: Eskimo, Crow, Omaha,  
65 Sudanese, Hawaiian, and Iroquois (figure 1). Further variations have been identified (e.g.  
66 Dravidian, Kachin) and other typological schemes for classifying kinship terminologies  
67 proposed, in particular those that concentrate on the terms applied to relatives in one's  
68 parental generation (for discussion, see Parkin 1997). Here, we take advantage of the  
69 large body of literature that has explored the Morgan/Murdock typology of kin terms  
70 for *cousins* and concentrate on these semantic typologies and their global distribution.

71 Systems of cousin terms can be ranked according to their paradigmatic complexity,  
72 that is, the number of distinctions they envelope in a single form. *Hawaiian* kinship  
73 systems use the same words to describe Ego's siblings and the children of Ego's par-  
74 ents' siblings. All relatives in Ego's generation are therefore called by sibling terms.  
75 *Eskimo* systems introduce a distinction between *siblings* and *cousins*: most major Euro-

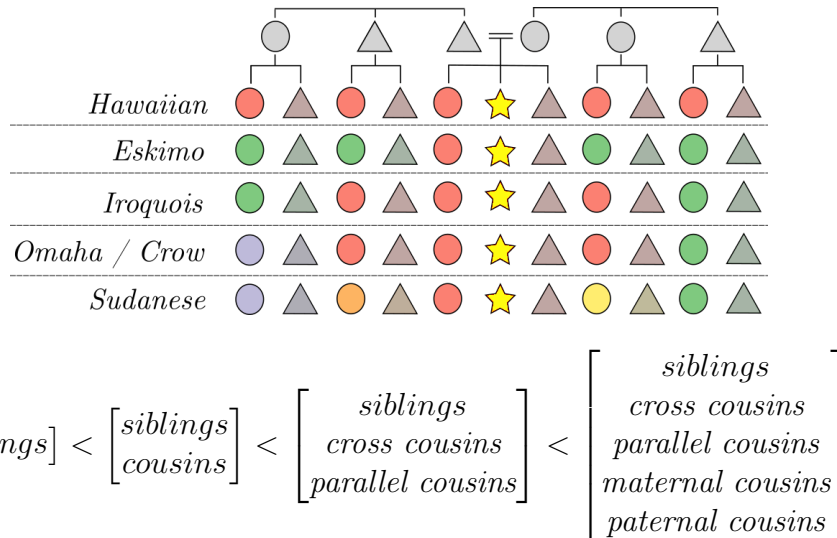

Figure 1: *Above*: Visual descriptions of the kinship typology. Circles indicate women, triangles indicate men, the star represents the ego. Colours indicate common terms. *Below*: Increase in cousin term paradigmatic complexity.

76 pean languages such as English belong to this category, as do many in South-east Asia.  
 77 *Iroquois* systems further discriminate parallel cousins (i.e. children of parent’s same-sex  
 78 siblings, such as father’s brother’s son) and cross-cousins (children of parent’s opposite-  
 79 sex siblings, such as mother’s brother’s son). *Crow* and *Omaha* systems introduce further  
 80 ‘skewed’ generational distinctions amongst cross-cousins of one’s matrilineage (*Crow*) or  
 81 patrilineage (*Omaha*), whilst removing generational distinctions for other cross-cousins.  
 82 *Sudanese* systems, on the whole, add a distinction between maternal- and paternal- cross-  
 83 and parallel-cousins, and fully descriptive systems discriminate all eight kinds of cousins  
 84 by gender and that of connecting relatives.

85 Moving from *Hawaiian* to *Sudanese* we see an increase in paradigmatic complexity, as  
 86 more terms are used to describe the same number of relations. This increase is structured  
 87 in the sense that distinctions comprise an implicational hierarchy (see Figure 1). This  
 88 structured variation in cousin terminology is a general aspect of kinship typology. Kin-  
 89 ship systems, like other cognitive category systems, are presumed to be inherited through  
 90 observation, imitation, and instruction. They are subject to small variations in replica-  
 91 tion, and the success of the variants hinges on two crucial general aspects of cognition –  
 92 the ease with which the system can be learned and its goodness-of-fit in modelling the  
 93 outside world. We can call the former *learning pressure* (see Tomasello 2009) and the  
 94 latter external *social practice* (see Bybee and Hopper 2001).

95 These pressures tie back to the issues raised in Section 1. A cognitive category system  
 96 must be learned by the individual, so a combination of salient environmental input (how  
 97 culture shapes cognition) and various cognitive biases (how cognition shapes culture) will  
 98 compete in shaping it. The question is (i) what form these biases take and (ii) how they

99 map to more general aspects of the social environment.

## 100 **1.2 Learning pressures, population size, and grammatical com-** 101 **plexity**

102 Learning pressure manifests both in the variability of input received by the learner and the  
103 learner’s own cognitive biases. Input variability affects category learning on the sound-  
104 and the word-level (Maye et al., 2002; Maye and Weiss, 2003; Rácz et al., 2017). The  
105 robustness of category learning is increased if information is distributed across a larger  
106 number of contexts. For instance, hearing the same word from multiple speakers makes  
107 it easier to recognise, process, and learn that word, although this claim has been called  
108 into question, see e.g. Atkinson et al. 2015.) At the same time, adult second language  
109 learners tend to process language differently from native child learners in that they select  
110 for variants of smaller morphological complexity (see e.g. DeKeyser 2000; Hudson Kam  
111 and Newport 2009). This means that context variability and the ratio of child and adult  
112 learners will have a long-term effect on linguistic complexity (for an alternate account,  
113 see Atkinson et al. 2018).

114 For a given language, both factors correlate with the number of speakers. What fol-  
115 lows is that we expect a correlation between linguistic category complexity and the size  
116 of the speaker population. Nettle (2012) provides an excellent summary of the evidence  
117 on the correlation between population size and linguistic category complexity. He notes  
118 (p.1829) that “[l]anguages of small communities tend to have smaller phonological in-  
119 ventories, longer words and greater morphological complexity than languages spoken in  
120 larger communities.” That is, the morphology of ‘larger’ languages tends to have less  
121 paradigmatic complexity.

122 Lupyan and Dale (2010) point to the role of adult learners in the correlation between  
123 population size and morphological complexity, arguing that a large ratio of adult learners  
124 results in morphologically simpler languages with more lexical marking. This is consonant  
125 with the overall picture, summarised by Nettle, that an increase in population size comes  
126 together with a decrease in morphological complexity. Bromham et al. (2015), using a  
127 sample of Polynesian languages, find that larger populations are more prone to gain new  
128 word forms in the basic vocabulary while smaller populations are more prone to lose  
129 forms within the same vocabulary. Reali et al. (2018) offer a formal modelling treatment  
130 of how a variant’s ease to be learned affects its diffusion in the community, and how this  
131 correlates with the size and composition of the community. Sinnemäki and Di Garbo  
132 (2018) highlight that, in looking at group size and morphological complexity, the number  
133 of adult learners (L2 speakers) does not trivially correlate with population size and that  
134 the effect on morphological complexity varies across morphological domains.

135 Grammatical/morphological complexity in this literature typically refers to paradigm-

136 matic complexity, introduced in Section 1. In larger speaker groups, grammatical re-  
137 lations are less likely to be expressed by different forms of the same word (the word's  
138 paradigm) and more likely to be paraphrased by a sequence of words. English has about  
139 340 million native speakers and two forms for each noun. Hungarian has about 13 mil-  
140 lion native speakers and about 16 forms for each noun. The Hungarian form 'házában'  
141 (house-Poss3sg-loc) translates in English as 'in his/her house'. Here, English makes up  
142 for paradigmatic complexity with syntagmatic complexity.

143 While we are not aware of previous cross-cultural work on kinship complexity and  
144 group size, paradigmatic and syntagmatic complexity readily apply to kinship terms.  
145 Polish has the term 'siostrzenica' to refer to a *sister's daughter* which can only be para-  
146 phrased in English (as 'niece' does not specify the gender of the parent). Here, again,  
147 Polish shows higher paradigmatic complexity, compensated by higher syntagmatic com-  
148 plexity in English.

149 Larger populations with a large amount of adult learners and high variability should  
150 have kinship systems with lower paradigmatic complexity, using fewer words to describe  
151 the same relations. We find support for this when we look at the use of kinship terms and  
152 related linguistic practices in specific small communities. For example, in Murrinhpatha  
153 in Northern Australia (Blythe, 2013) and in Datooga in Northern Tanzania (Mitchell,  
154 2016), learning kinship terms or kinship-related practices, such as name avoidance, re-  
155 quires a great extent of familiarity with the kinship relations of the entire local community.  
156 Farber (1975) discusses, on a greater scale, how this type of familiarity changes in larger  
157 communities with shifts in kinship practice.

158 Previous research has suggested a number of ways in which population size can influ-  
159 ence paradigmatic complexity in language. This includes the ratio of adult learners, input  
160 variability, and ease of transmission in the community, all of which are correlated with the  
161 size of the overall speaker population. All these arguments can apply to the paradigmatic  
162 complexity of kinship systems. The essential point here is that a set of learning biases  
163 can mediate the effects of population size, and, as a result, become mainly responsible  
164 for variation in kinship systems.

### 165 **1.3 Social practice**

166 An alternative explanation for the paradigmatic complexity of kinship systems is that  
167 these are shaped by the specific social practices that make use of kinship terms; patterns  
168 of wealth transfer, marriage, or inheritance. Links between kinship systems and such  
169 practices have been extensively documented in the cultural anthropology literature (see  
170 for example the Explaining Human Culture database of hypotheses at the Human Rela-  
171 tions Area Files, Inc 2017), based on correlations in the Ethnographic Atlas (Murdock,  
172 1967), the Standard Cross-Cultural Sample (Murdock and White, 1969), or specific lan-

173 guage groups. We provide here some examples to give a flavour of the kinds of associations  
174 described in the literature, but these are by no means exhaustive.

175 Murdock (1947) finds a correlation between the use of *Crow* and *Omaha* systems  
176 (which discriminate cross- and parallel-cousins on the father's or the mother's side, re-  
177 spectively), *exogamy* (marrying outside the community) and/or unilinear descent (traced  
178 on the mother's or the father's side). Here, the social pressure comes from distinguishing  
179 who is and who is not in one's matri- or patri-lineage. Murdock (1949) returns to these  
180 findings and adds that a *clan* system or exogamous moieties also favour *Crow / Omaha*  
181 cousin terms. In both these instances, the kinship systems reflect who may be available for  
182 marriage. Coult (1965) finds correlations between, on the one hand, *Omaha* cousin terms,  
183 *patrilineal descent*, and preferential *matrilineal cross-cousin marriage* and, on the other  
184 hand, *Crow* terms, *matrilineal descent*, and preferential *patrilineal cross-cousin marriage*.  
185 *Iroquois* terms (cross- and parallel-cousins are discriminated on both parent's side) corre-  
186 late with preferential *bilateral cross-cousin marriage* in his sample. We should note that  
187 more recent work, relying on more advanced methods, puts at least some of these claims  
188 to question, as in the case of Guillon and Mace (2016), whose comparative phylogenetic  
189 analysis finds little evidence for the co-evolution of cousin terms and descent organisation  
190 in Bantu languages.

191 Goody (1970) surveys cousin terms and finds a correlation between *Hawaiian* terms  
192 and the prohibition of cross-cousin marriage. A cross-cousin will be called 'sibling' in an  
193 Hawaiian system, so here the semantic system reflects the incest taboo. *Iroquois* terms are  
194 found with preference for cross-cousin marriage, and it is precisely some cross-cousins who  
195 might be outside one's lineage and thus available for marriage. Much like Coult, Goody  
196 finds a correlation between *Omaha*, *Crow*, and *Eskimo* terms and *patrilineal*, *matrilineal*,  
197 and *bilateral* descent, respectively. Köbben et al. (1974) supports Goody's findings on the  
198 link between *Hawaiian* terms and the prohibition of cross-cousin marriage, and establishes  
199 a correlation between *Crow / Omaha* terms and prohibition of marriage into the line of  
200 cross cousins.

201 The intuition underlying these correlations is that the semantic system reflects social  
202 practice. If marriage is permitted to certain types of siblings/cousins, these types should  
203 be named separately; emphasis on one line of descent should make distinctions on that  
204 line more salient.

## 205 1.4 Hypotheses

206 The broader cognitive literature on category complexity and population size and the an-  
207 thropology literature on kinship terms and social practice provide us with two hypotheses  
208 that are testable against a cross-cultural sample.



- 209 1. **The main source of kinship complexity is speaker group size.** Kinship  
210 systems vary in paradigmatic complexity. Paradigmatic complexity decreases with  
211 an increase in population size. This means that larger or more complex communities  
212 will use simpler kinship systems, irrespective of Sprachbund and language family  
213 effects.
- 214 2. **The main source of kinship complexity is associated social practice.** Kin-  
215 ship systems vary in structure. Various cultural practices (such as marriage or  
216 inheritance) rely on kinship distinctions. This means that the use of a kinship sys-  
217 tem will be linked to the presence or absence of these practices across communities:  
218 a society with prevalent cousin marriage or a society with asymmetrical patterns of  
219 descent and transfer will make more distinctions across siblings and cousins.

## 220 2 Methods

221 We examine the distribution of cousin term systems across 1291 societies in the D-PLACE  
222 online ethnographic database ([d-place.org](http://d-place.org)) (Kirby et al., 2016), largely based on data  
223 from the Ethnographic Atlas (Murdock, 1967)<sup>1</sup>. We work with 936 societies which have  
224 available information on kinship systems. The distribution of kinship systems can be  
225 seen in Figure 2. Here we display the variation in a subset of societies (those from the 12  
226 largest language families represented in D-PLACE) to visualise the influence of shared  
227 linguistic history on kinship diversity.

### 228 2.1 Outcome

229 Our outcome variable is the complexity of the kinship system which we quantify based  
230 on the number of distinction across cousin terms, as discussed in Section 1.1 (EA027 in  
231 the Ethnographic Atlas – for details, see Appendix). We posit the ranking of *Hawaiian*  
232  $< Eskimo < Iroquois < Crow / Omaha < Sudanese / Descriptive$  (see Figure 1).

233 This quantification is simplified. For example, many *Hawaiian* systems make a dis-  
234 tinction between Ego’s younger and older siblings/cousins. At the same time, the lack of  
235 distinction persists between ‘sibling’ and ‘cousin’ in these systems, such that our ranking  
236 still holds.

237 More complex characterisations of kinship system complexity, such as a calculation of  
238 entropy, require systematic kin-term lexical data comparison. We are currently build-  
239 ing such a dataset to be publicly available (KinBank, see [https://excd.org/research-](https://excd.org/research-activities/varikin)  
240 [activities/varikin](https://excd.org/research-activities/varikin)), but in order to make large global comparisons here we focus on cousin  
241 terms.

---

<sup>1</sup>Code and data available at <http://doi.org/10.5281/zenodo.2625861>

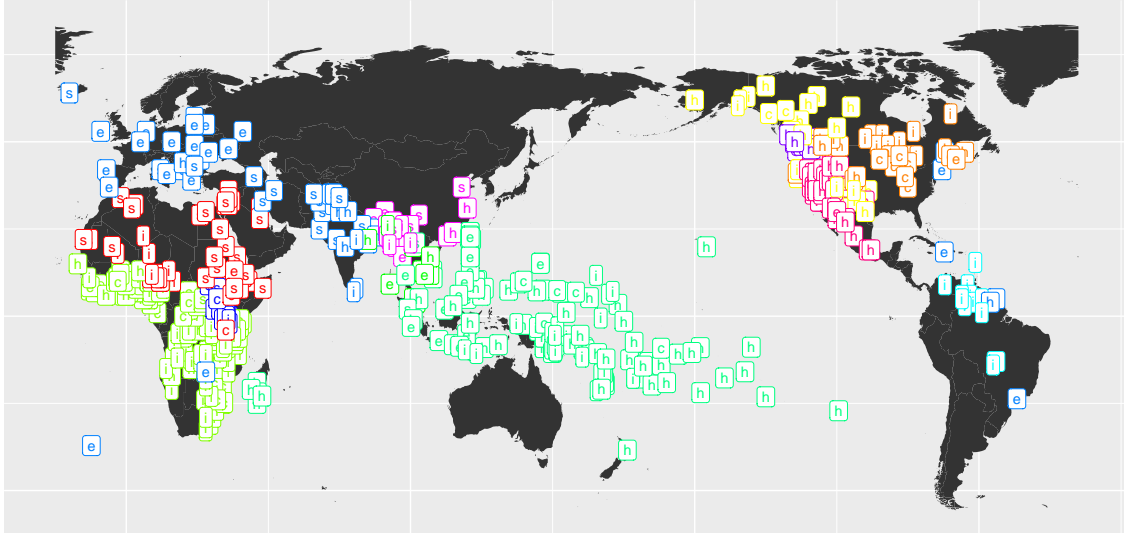

[h]awaiian, [e]skimo, [i]roquois, [c]row/omaha, [s]udanese/descriptive. twelve largest language families.

Figure 2: Global distribution of kinship systems across twelve largest language families in D-PLACE ([H]awaiian, [E]skimo, [I]roquois, [C]row/Omaha, [S]udanese/Descriptive)

## 2.2 Population-level factors

We have two groups of population-level factors.

Hypothesis 1 hinges on *population size* (EA202) and *community size* (EA031), represented in the Ethnographic Atlas data in D-PLACE. Population size is defined therein as the size of the ethnic group as a whole. Community size represents an average population of local communities and is equally important as it determines the amount of variation and adult/child learner ratios in the individual learner’s language environment.

However, a large amount of data are missing for population size (27.03%) and community size (46.26%). Other indicators of community size are available: *settlement patterns* (EA030), *the number of jurisdictional levels in the local community* (EA032) *the number of jurisdictional levels beyond the local community* (EA033). The first one captures settlement size and complexity, categorising societies from migratory bands to complex permanent settlements (pairwise correlation with population size (logged):  $r = 0.41$ ). The second one focusses on the power hierarchy within settlements, ranging from independent families to clan districts ( $r = 0.22$ ). The third one pulls focus onto inter-settlement patterns, ranging from no authority beyond the local community to chiefdoms to complex states ( $r = 0.58$ ). While *subsistence* (EA042) is not a direct proxy of population size, different subsistence types will typically support populations of various sizes: forager populations are generally smaller, and societies that rely on intensive agriculture can be larger ( $r = 0.44$ , using numeric subsistence complexity). Following Botero et al. 2014 we combine these factors with population size and community size to estimate social group size and social complexity.

264 Hypothesis 2 hinges on a set of cultural practices coded in the Ethnographic Atlas  
265 data in D-PLACE. These are the *prevalence of cousin marriage* (EA023, ranging from  
266 complete proscription to the allowance of marriage to first cousins), *community marriage*  
267 *patterns* (EA015, exogamous, endogamous, or agamous), and *descent* (EA043, patrilineal,  
268 matrilineal, bilateral, ambilineal, or mixed); see the Appendix for details.

## 269 2.3 Grouping factors

270 It is evident from Figure 2 that the kinship system of a community is highly correlated  
271 with the language spoken in the community and the community’s location. For example,  
272 groups across the Pacific in the large Austronesian language family mostly have *Hawai-*  
273 *ian* kinship. European languages mostly have *Eskimo* kinship, including Hungarian, a  
274 non-Indo-European language. As a consequence, we incorporate language family and  
275 geographical proximity in the analysis by adding a grouping factor for language family  
276 and one for the named geographic region, both taken from D-PLACE.

## 277 2.4 Data analysis

278 The dataset is challenging in two ways, both typical for cross-cultural data. Predictor  
279 variables are correlated (e.g. a society with unilineal descent is more likely to permit  
280 cousin marriage) and a lot of data are missing – *population size* and *community size* are  
281 two good examples. Our approach aims to account for these issues without the use of  
282 stepwise regression modelling, which increases the likelihood of Type I errors (Flom and  
283 Cassell, 2007).

284 We use a multilevel ordered categorical model to fit on the data (Wood, 2006; Wood  
285 et al., 2016) in R (R Core Team, 2016). We use `ggplot` to create the plots (Wick-  
286 ham, 2009). Our outcome variable is the type of kinship system, ranked by complexity  
287 (*Hawaiian* < *Eskimo* < *Iroquois* < *Crow / Omaha* < *Sudanese / Descriptive*). An or-  
288 dered categorical model estimates an intercept for all levels of the outcome variable and  
289 assumes that they have a set order.

290 We fit two hypothesis-testing models, one using predictors relevant to Hypothesis 1  
291 (*population size (logged)*, *community size*, *jurisdiction*, *local jurisdiction*, *settlement pat-*  
292 *terns*, and *subsistence*) and the other using predictors relevant to Hypothesis 2 (*prevalence*  
293 *of cousin marriage*, *descent*, *community marriage practice*). We do not impute missing  
294 data and instead fit each model on the maximum number of societies with available data  
295 for all predictors. This leaves us with  $n=366$  for *Model 1* and  $n=779$  for *Model 2*). We  
296 then remove predictors with  $-1.5 < z < 1.5$  and use a chi square test on the difference  
297 in scores and degrees of freedom as well as the Akaike Information Criterion for model  
298 selection. Subsequently, streamlined models are refit on the maximum number of data  
299 available. This procedure is followed to arrive at a best fit for each model.

300 The predictors from the best fits of the two models – *local jurisdiction*, *subsistence*,  
301 *descent*, and *cousin marriage* – are combined in *Model 3*. These are predictors that are  
302 relevant to testing our hypotheses. We also have evidence of their robustness. Using all  
303 possibly relevant predictors would inflate multicollinearity and create a data imputation  
304 problem, both of which are largely avoided using our approach.

305 This model is fit on all societies with data available on all these predictors (n=743).  
306 To check robustness, *Model 3* is also re-fit on data subsets (a) excluding Indo-European  
307 societies, (b) excluding the largest 5% of societies, and (c) limiting the dataset to societies  
308 in the Standard Cross-Cultural Sample (SCCS, Murdock and White 1969), albeit using  
309 the same predictors derived from the Ethnographic Atlas.

310 Our justification for (3a) is that many Indo-European speakers are members of West-  
311 ern, rich, industrialised democracies and these groups tend to be outliers of broader  
312 ethnographic variation (Henrich et al., 2010). We have a similar reasoning for (3b) – we  
313 use population size to exclude the largest 5% and while population size data are missing  
314 for many societies, we expect that, for large societies, it will be more readily available,  
315 allowing for our method of exclusion. We use (3c) to render testing more robust, because  
316 the SCCS is a widely used sample of human societies that is deliberately stratified by  
317 region to minimise the effect of ancestry and diffusion (‘Galton’s Problem’ and spatial  
318 autocorrelation), and the sample was chosen to be representative of human lifeways.

319 Finally, to explore these relationships at finer resolution than the global level, we  
320 take a phylogenetic approach (Mace and Pagel, 1994; Blute and Jordan, 2018). We use  
321 language phylogenies (evolutionary trees) of three large representative language families,  
322 and a subset of the cultural data used for our models to calculate the phylogenetic signal  
323 for a set of traits. By mapping cultural data onto the tips of a language tree, we are able  
324 to measure how well a trait is structured by the branching relationships of cultural history.  
325 If a trait is primarily vertically inherited from parent to offspring cultural groups, then  
326 phylogenetic signal will be high. If traits are subject to cultural borrowing, independent  
327 innovation, stochastic change, or rapid contextual change, signal will be low.

### 328 **3 Results**

329 We quote four models here and discuss one in detail (see Table 1; note that we use  
330 zero-based numbering. We return to robustness checks and high resolution phylogenetic  
331 analysis in Section 3.2.

332 *Model 0* has no population-level effects and only contains grouping factors for *language*  
333 *family* and *geographic region*. As we can see, this model already explains some amount of  
334 variation (18%), underscoring that *language* family (shared history) and *region* (spatial  
335 diffusion opportunities and shared adaptation) are very important factors in determin-  
336 ing the kinship system used in a community. These grouping factors are present in all

Table 1: Summary statistics for models

| Model                     | n obs. | cumulative deviance explained |
|---------------------------|--------|-------------------------------|
| 0 (only grouping factors) | 936    | 0.18                          |
| 1 (social complexity)     | 807    | 0.19                          |
| 2 (social practice)       | 841    | 0.23                          |
| 3 (combined)              | 743    | 0.23                          |

337 subsequent models.

338 *Model 1* is fit to determine the relevance of predictors for Hypothesis 1 (i.e. social  
 339 complexity is inversely proportional to kinship complexity). The fixed effects that remain  
 340 relevant are *jurisdiction on a local level* and *main mode of subsistence*. *Population* and  
 341 *community size*, *jurisdiction beyond the local level* and *settlement patterns* are not relevant  
 342 in predicting kinship system. This can be either because these factors are not directly  
 343 relevant to kinship complexity, or because too many data are missing for meaningful  
 344 inference.

345 *Model 2* is fit to determine the relevance of predictors for Hypothesis 2 (social practice  
 346 affects kinship complexity). The fixed effects that remain relevant are *descent* and *preva-*  
 347 *lence of cousin marriage*. *Community marriage patterns* are not relevant in predicting  
 348 the use of a particular kinship system.

349 The relevant aspects of models 1&2 are that both explain some amount of variation  
 350 in the data, but that the additional explaining power of Model 1 is relatively low – social  
 351 complexity plays little, if any role.

352 *Model 3* is our combined model. It contains the relevant predictors from *Model 1* and  
 353 *Model 2*. The summary of the fixed effects can be seen in Table 2. The base levels are  
 354 ‘intensive agriculture’ for subsistence and ‘patrilineal’ for descent. These are essentially  
 355 arbitrary, though the plurality of societies are patrilineal.

Table 2: Summary of the fixed effects, Model 3 (Predictor name, estimated effect, standard error, and z value).

|                                    | Estimate | Std. Error | z value |
|------------------------------------|----------|------------|---------|
| (Intercept)                        | -0.073   | 0.511      | -0.142  |
| local jurisdictional hierarchy     | -0.005   | 0.137      | -0.036  |
| subsistence:extensive agriculture  | 0.062    | 0.217      | 0.285   |
| subsistence:foraging               | -0.149   | 0.276      | -0.540  |
| subsistence:pastoralism            | 0.882    | 0.382      | 2.310   |
| cousin marriage                    | 0.461    | 0.078      | 5.904   |
| descent:matrilineal                | -0.115   | 0.243      | -0.473  |
| descent:bilateral or quasi-lineage | -1.656   | 0.232      | -7.146  |
| descent:duo- or ambi-lineal        | -1.100   | 0.301      | -3.656  |
| descent:mixed                      | -1.456   | 0.384      | -3.789  |

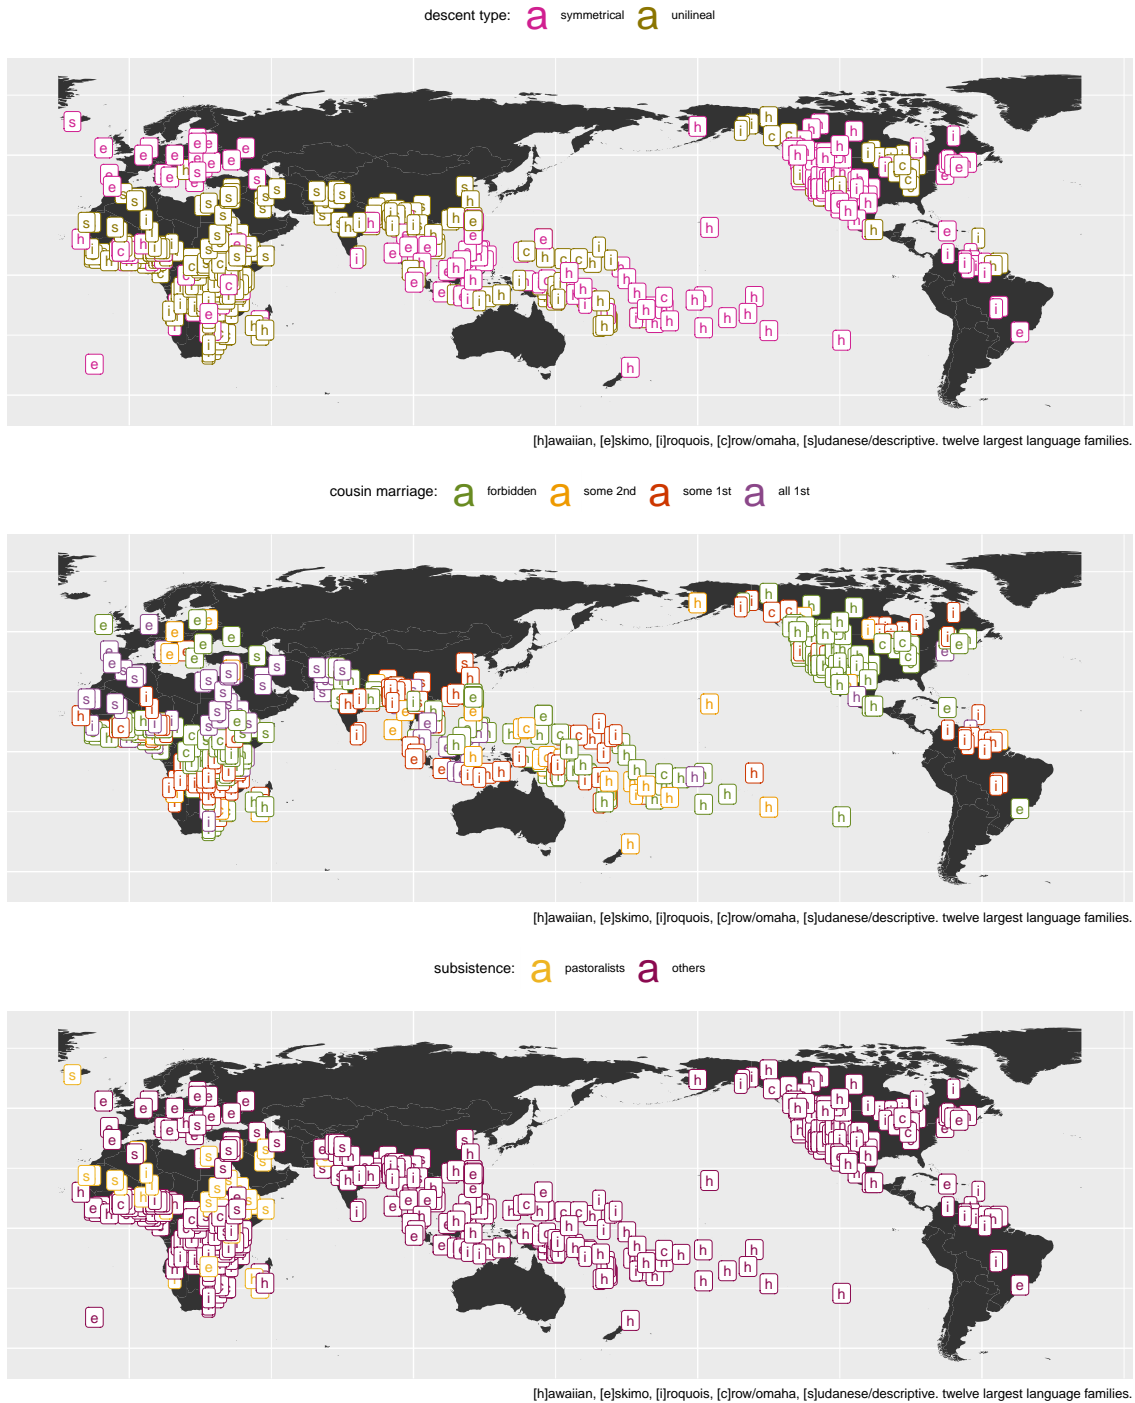

Figure 3: The distribution of social predictors and kinship systems. Panel (a) shows kinship system versus descent category. Symmetrical descent includes societies coded as bilateral or double descent; unilineal includes societies coded as patrilineal or matrilineal. Panel (b) shows cousin marriage practice: forbidden, some 2<sup>nd</sup> cousins, some 1<sup>st</sup> cousins, all 1<sup>st</sup> cousins. Panel (c) divides societies by whether they are pastoralists or not.

356 Our proxy of community size, *local jurisdictional hierarchy*, is not a robust predictor  
357 of kinship complexity. Robust predictors ( $-1.5 > z > 1.5$ ) are *subsistence*, *prevalence of*  
358 *cousin marriage*, and *descent*. *Pastoralist* societies are more likely to have more complex  
359 kinship systems. We had no starting assumptions about pastoralists, so this is a curious  
360 result and we return to it in the discussion. Kinship complexity increases with more  
361 prevalent cousin marriage. *Symmetrical* descent systems (such as *bilateral* or *ambilineal*  
362 ones) are likely to have less complex kinship systems than *unilineal* (*patri-* or *matrilineal*)  
363 ones.

364 While model fitting is explicitly designed to avoid multicollinearity, it remains an issue  
365 given the nature of the predictors. A *post hoc* inspection of variance inflation factors  
366 (Clifford, 2016) reveals that confidence intervals for the robust predictors can be inflated  
367 up to a rate of 2.1-3.01 times. This especially casts a doubt on the effect of *pastoralism*,  
368 which is estimated to be relatively small in the first place. The other predictor estimates  
369 are larger and more resilient in the face of possible multicollinearity effects.

370 Figure 3 illustrates the global distribution of some of the relevant predictors – descent  
371 type, cousin marriage, and subsistence – against kinship system type. It demonstrates the  
372 spatial (and historical) clustering of many co-associations in the ethnographic data. For  
373 example, across Northern Africa and the Middle East, we see substantial co-occurrence  
374 of pastoralism, Sudanese/Descriptive kinship systems, and marriage with first cousins.  
375 These co-occurrences are not new observations, and have been attributed as adaptations  
376 to unproductive environments in the case of pastoralism (see Pryor 2005), and in the case  
377 of Sudanese kinship, as logical-linguistic indicators that some relatives are marriageable  
378 while others are not. Importantly, our results show that while shared history and envi-  
379 ronment can account for some co-occurrence in language and culture between societies,  
380 there is further variation left to explain.

### 381 **3.1 Predictions**

382 Figure 4 shows the predictions of *Model 3*, aggregated across levels of the predictors, with  
383 aggregated estimated standard errors. The model gives a probability for society having  
384 each kinship system; these add up to 1. Figure 4 aggregates the predicted probabilities  
385 and standard errors across levels of the predictors.

386 For instance, (upper left panel) the likelihood of having a simpler Hawaiian system  
387 drops with the increase in the prevalence of cousin marriage. In contrast, the likelihood of  
388 having a more complex Sudanese system increases under this condition. One has to bear  
389 in mind that the model assumes these systems to be ordered according to complexity.  
390 This means that the subsistence effect is more robust for pastoralists (upper right panel)  
391 than for foragers. This is because, in the former case, we see e.g. both a drop in the  
392 likelihood of Hawaiian and an increase in the likelihood of Sudanese. Kinship complexity

393 is higher for unilineal than for symmetrical systems, driven by all types except Crow /  
394 Omaha and Eskimo (lower left), while, despite the drop in the likelihood of Hawaiian,  
395 local political complexity overall does not co-vary with kinship complexity in this model  
396 (lower right).

## 397 **3.2 Robustness checks and phylogenetic signal**

398 Fitting *Model 3* on data (a) after excluding Indo-European speaking societies or (b) the  
399 largest 5% in terms of population size yields very similar results, except that, in the latter  
400 case, the distinction between *pastoralists* and other subsistence types is diminished.

401 In terms of (c) comparing the Standard Cross-Cultural Sample and the Ethnographic  
402 Atlas: All 186 societies of the SCCS are present in the Ethnographic Atlas, but only 161  
403 have all the required data, so we fit the model on these societies. This yields similar re-  
404 sults on the population-level predictors: pastoralists and more prevalent cousin marriage  
405 practices are correlated with more complex kinship systems, along with unilineal (as op-  
406 posed to symmetrical) descent systems. One main difference is that language family and  
407 region are no longer significant predictors in this model, which is to be expected given  
408 the stratified purpose of the SCCS.

409 On the whole, our regression analysis finds strong effects of *cousin marriage* and  
410 *descent*, along with an effect of *subsistence* (pastoralists/other main sources of subsistence)  
411 on the complexity of the kinship system in the societies of the sample. The effects remain  
412 robust if we take into consideration the skewing effect of Indo-European or very large  
413 societies, and also remain for the smaller set of societies in the SCCS. However, one  
414 simplification of the regression model is that it treats language families as trees with  
415 no internal structure, effectively assuming the same distance between all languages that  
416 belong to a given family.

417 In order to test for cultural inheritance using a higher resolution, we use phylogenetic  
418 ‘D’ tests to determine if kinship systems display phylogenetic structure (Fritz and Purvis,  
419 2010). A ‘D’ test provides a value to express the extent to which patterns are constrained  
420 by the evolutionary relationships between societies (cultural history) or dispersed ran-  
421 domly across the phylogenetic tree. We use language family trees (phylogenies) from  
422 D-PLACE to estimate the D statistic and its associated p-values for the most common  
423 kinship system types in three different language families: Austronesian (85 observations),  
424 Bantu (69 observations), and Uto-Aztecan (22 observations). Because multiple histories  
425 might be inferred from any linguistic data set, for each family we test D across 1000 trees  
426 derived using Bayesian phylogenetic inference (Gray et al., 2009; Grollemund et al., 2015;  
427 Dunn et al., 2011). Each of these trees represent a slightly different but highly plausible  
428 reconstruction of cultural history. We infer a value of D for kinship system types that are  
429 seen in more than 10% of societies on the language tree: Eskimo, Hawaiian, and Iroquois



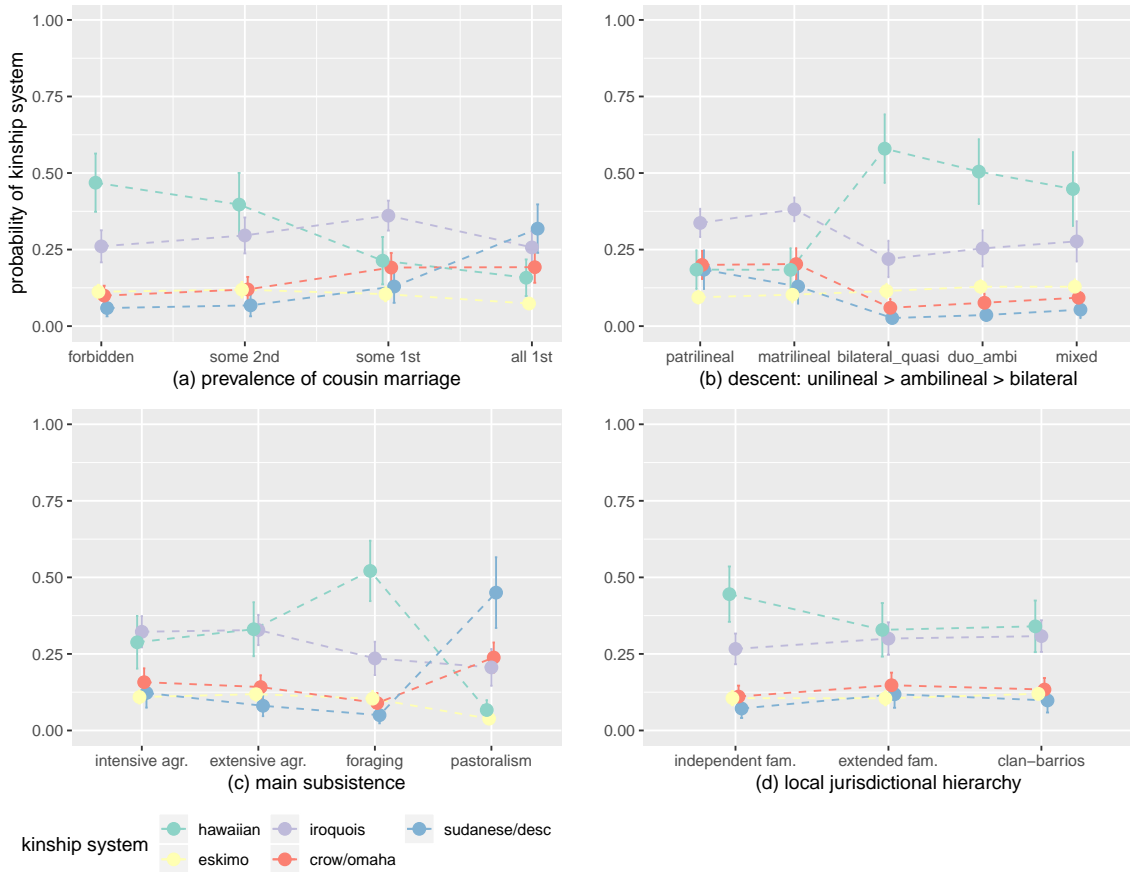

Figure 4: Predictions of the combined model. The ordered outcome categories are *Hawaiian* < *Eskimo* < *Iroquois* < *Crow / Omaha* < *Sudanese / Descriptive*. For each panel, we show the probability of any particular kinship system for a given category of (a) cousin marriage (b) main form of subsistence (c) descent system and (d) local jurisdictional hierarchy. (a) Cousin marriage is categorised as (i) all forms forbidden, (ii) some 2nd cousins, (iii) some 1st cousins, (iv) all 1st cousins; (b) subsistence is categorised as (i) intensive and (ii) extensive agriculture, (iii) foraging, and (iv) pastoralism; (c) descent systems are categorised as unilineal / ambilineal / bilateral, and, specifically, as (i) patrilineal, (ii) matrilineal, (iii) bilateral, (iv) ambilineal, (v) mixed; (d) local jurisdictional hierarchy is categorised as (i) independent and (ii) extended families, (iii) clan-barrios.

Table 3: D-statistic tests of phylogenetic structuring for terminological types, in three large language families. A D-statistic close to or greater than 1 indicates a random distribution, not structured by the phylogeny. A D statistic close to 0 implies consistency with Brownian motion along the branches of the phylogeny, i.e. structuring by descent. D less than 0 implies strong phylogenetic clustering.

|                      |          | Present | D-Statistic |
|----------------------|----------|---------|-------------|
| Austronesian(n = 85) | Eskimo   | 14      | -0.498      |
|                      | Hawaiian | 48      | 0.659       |
|                      | Iroquois | 15      | 0.095       |
| Bantu(n = 69)        | Hawaiian | 9       | 0.402       |
|                      | Iroquois | 44      | 0.162       |
|                      | Omaha    | 8       | 0.780       |
| Uto-Aztecan(n = 22)  | Hawaiian | 16      | -0.596      |
|                      | Iroquois | 4       | -2.336      |

430 systems in Austronesian; Hawaiian, Iroquois and Omaha systems in Bantu; and Crow,  
 431 Eskimo, Hawaiian, and Iroquois systems in Uto-Aztecan.

432 Across all three families we find that around half of the kinship systems show mean-  
 433 ingful phylogenetic signal (i.e. D close to or less than 0) at a fine-grained local level,  
 434 demonstrating the importance of shared ancestry in structuring complexity in semantic  
 435 systems even in closely related languages. The D values can be seen in Table 3.

## 436 4 Discussion

437 We used multilevel ordered categorical models to account for an axis of kinship system  
 438 complexity across hundreds of human societies. We tested two hypotheses that emerged  
 439 from the literature on the correlates of semantic complexity and kinship systems: the  
 440 effects of speaker group size and cultural practices. Our analysis of the evidence does  
 441 not support a link between an increase in community size and a decrease in kinship  
 442 system complexity, but we do find support for the position that kinship systems are co-  
 443 determined by specific practices of marriage and descent. In doing so, we also assessed the  
 444 extent to which spatial proximity and shared ancestry influence our measure of kinship  
 445 complexity. We found that while both explain some variation at a global scale on a large  
 446 unstratified data set, detecting these effects is subject to the scale and type of analysis.

447 Our evidence for both main findings remains robust when we control for the effect of  
 448 language family and spatial proximity, is resilient to multicollinearity, and our analyses do  
 449 not hinge on the inclusion of data points from large-population states or Indo-European  
 450 societies. This is striking, as large cross-cultural analyses are inevitably plagued by noise  
 451 in the data, related to the inherent patchiness and unstructured nature of much ethno-  
 452 graphic data. Data on population and community size is difficult to extrapolate from  
 453 ethnographic sources where a formal census is not available, and is restricted to a par-

454 ticular time and place foci (Ember et al., 1992). Despite these complexities, our aim  
455 was to avoid the methodological pitfalls related to the regression analysis of large sets of  
456 co-varying factors in incomplete data, such as the use of unprincipled top-down stepwise  
457 regression (Flom and Cassell, 2007). Instead, we opted to rely on expert judgment (Gal-  
458 lison and Daston, 2007) in choosing a set of factors to compare two plausible hypotheses,  
459 adapted to variation in kinship systems and to see which one explained more variation  
460 in our data.

461 The low predictive power of our models strongly suggests that kinship systems evolve  
462 in complex, multifaceted processes which are difficult to capture in a correlational study.  
463 While other studies have detected some broad predictive trends in cultural features, such  
464 as an association between poorer environment and the presence of a belief in moralising  
465 high gods (Botero et al., 2014), it may be that here the global scope of our analyses masks  
466 important regional cultural dynamics of kinship systems. Our tests for phylogenetic  
467 signal support this supposition: different kinship systems show phylogenetic clustering  
468 in different language families, echoing the lineage-specificity found in word-order studies  
469 (Dunn et al., 2011). Ultimately, language family remains the most important predictor  
470 of kinship system in our analyses. Given that some large language families such as Indo-  
471 European, Austronesian, and Bantu are associated with Neolithic spread of agricultural  
472 technologies (Bellwood, 2005), and that changes in subsistence have been considered  
473 to be catalysts for change in social organisation (Nimkoff, 1965; Ember et al., 1992;  
474 Apostolou, 2010; Walker et al., 2013), we suggest that language-family level approaches  
475 using comparative phylogenetic methods (Jordan, 2013) may test these coevolutionary  
476 hypotheses in future.

477 While our results suggest that our measure of kinship complexity is determined by  
478 specific practices and not by community size or population size, the effect of *subsistence* on  
479 kinship complexity remains an exception. Pastoralists tend to have more complex kinship  
480 systems than agriculturalists or foragers. Holden and Mace (2003) discuss the relationship  
481 between the emergence of *patriliney* and cattle ownership in the Bantu. They explain the  
482 apparent connection (cattle ownership leads to patriliney) in terms of wealth transfer –  
483 herds of cattle need to be held together to defend and inherit, favouring male heirs. This  
484 explanation, scaled upwards, could apply to our data. Cattle ownership shapes wealth  
485 transfer practices and these, in turn, shape kinship. This means that subsistence should  
486 be interpreted as a proxy for social practices rather than a proxy for overall complexity  
487 of social organisation. Our result on pastoralism should be treated with reservations,  
488 however, as it is relatively weak and more sensitive to predictor multicollinearity.

489 The co-variation of kinship systems with specific practices, rather than group size,  
490 has implications for the debate on the relationship between linguistic and speaker group  
491 complexity. Works such as Nettle (2012) and Realì et al. (2018) point to and formalise  
492 broad biases in learning and transmission for aspects of language that co-vary with group

493 size. These include low-level, closed sets of function words, like morphology, and higher-  
494 level, open sets of content words, like vocabulary.

495 Kinship systems are closed sets of content words, entwined with social practice. In  
496 some cases, kinship is able to ‘invade’ the grammar and be marked on e.g. verb agreement  
497 (Blythe, 2013). This means that it is an ideal testing ground for hypotheses on the effects  
498 of broad biases and specific practices on language use. Our phylogenetic signal analyses  
499 are suggestive: on our measure of complexity, the most complex systems that we tested  
500 (Crow, Omaha) are not structured by long-term shared ancestry, and perhaps more liable  
501 to change from learning pressures. What we infer from cross-cultural variation in kinship  
502 is that caution is warranted in attributing patterns of cross-cultural variation to broad  
503 biases because these patterns are more likely to be mediated by specific cultural practices.  
504 No doubt, these practices are sensitive to group size (exemplified by the difference between  
505 pastoralists and other forms of subsistence in Bantu language groups). It is simply to say  
506 that a rounded account of explaining cognitive diversity should consider macro (cultural  
507 evolutionary) as well as micro (cognition and learning) drivers. Given that kinship is  
508 a good example of an intermediate lexical class, these results could be generalised as  
509 informative for the broader debate.

510 The intermediate nature of kinship systems in language invokes the parallel of a  
511 separate debate in anthropology and archaeology on the correlation between population  
512 size and *toolkit size* (Henrich, 2004; Aoki, 2018). The major difference is that unlike  
513 tools, cultural practices or the specialised vocabulary that goes with them (e.g. kinship  
514 words) – *and* the systems in which they articulate – have to be learned by everyone in  
515 the community. As a consequence, many of the explanations proposed for the correlation  
516 between toolkit size and population size may not be applicable to kinship.

517 This paper builds on the existing literature on language complexity in general and  
518 kinship systems in particular. It is novel in extending arguments on population size  
519 and complexity to kinship system and comparing population size and social practice at  
520 an unprecedented scale. The results presented here are both larger in scope and more  
521 statistically principled than previous work on the correlates of kinship systems, rendering  
522 our findings fairly robust. Further, we see our contribution as demonstrating how kinship  
523 categories, a key aspect of social cognition, can be approached in a comparative and  
524 cultural-evolutionary manner alongside the standard individual-level experimental and  
525 modeling tools of cognitive science. Further research combining the macro and the micro  
526 can help give a well-rounded account of the constraints on human social categories.

## 527 **5 Acknowledgements**

528 We would like to thank Joe Blythe, Simon Greenhill, Alice Mitchell, Sean Roberts, Alex  
529 Schumacher, and Catherine Sheard, as well as three reviewers for their useful insights

530 which improved this paper. We particularly thank Andrea Bender and Sieghard Beller  
531 for their encouragement. This research was funded from the European Research Council  
532 (ERC) under the European Union’s Horizon 2020 research and innovation programme  
533 (grant agreement No 639291, Starting Grant VARIKIN), and was supported by a Lever-  
534 hulme Research Fellowship (47690) to F.M.J.

## 535 **References**

- 536 Aoki, K. (2018). On the absence of a correlation between population size and ‘toolkit size’  
537 in ethnographic hunter-gatherers. *Philosophical Transactions of the Royal Society B:*  
538 *Biological Sciences*, 373(1743).
- 539 Apostolou, M. (2010). Bridewealth as an instrument of male parental control over mat-  
540 ing: Evidence from the standard cross-cultural sample. *Journal of Evolutionary*  
541 *Psychology*, 8:205–216.
- 542 Atkinson, M., Kirby, S., and Smith, K. (2015). Speaker input variability does not explain  
543 why larger populations have simpler languages. *PloS one*, 10(6):e0129463.
- 544 Atkinson, M., Smith, K., and Kirby, S. (2018). Adult learning and language simplification.  
545 *Cognitive science*, 42(8):2818–2854.
- 546 Bellwood, P. (2005). *First Farmers: the Origins of Agricultural Societies*. Malden (MA):  
547 Blackwell.
- 548 Blute, M. and Jordan, F. (2018). The evolutionary approach to history: sociocultural  
549 phylogenetics. In Hopcroft, R., editor, *Oxford Handbook of Evolution, Biology, and*  
550 *Society*. Oxford University Press.
- 551 Blythe, J. (2013). Preference organization driving structuration: Evidence from Aus-  
552 tralian Aboriginal interaction for pragmatically motivated grammaticalization. *Lan-*  
553 *guage*, 89(4):883–919.
- 554 Botero, C. A., Gardner, B., Kirby, K. R., Bulbulia, J., Gavin, M. C., and Gray, R. D.  
555 (2014). The ecology of religious beliefs. *Proceedings of the National Academy of*  
556 *Sciences*, 111(47):16784–16789.
- 557 Boyd, R., Durham, W. H., and Richerson, P. J. (1997). Are cultural phylogenies possible.  
558 In *Human by nature: Between biology and the social sciences*, pages 355–384.
- 559 Bromham, L., Hua, X., Fitzpatrick, T. G., and Greenhill, S. J. (2015). Rate of language  
560 evolution is affected by population size. *Proceedings of the National Academy of*  
561 *Sciences*, 112(7):2097–2102.

- 562 Bybee, J. L. and Hopper, P. J. (2001). *Frequency and the emergence of linguistic structure*.  
563 Amsterdam: John Benjamins.
- 564 Clifford, S. (2016). Variance inflation factor for generalized additive models.  
565 <https://gist.github.com/samclifford/e1223861931c69ff159c8c680a96c11d>.
- 566 Coult, A. D. (1965). Terminological correlates of cross-cousin marriage. *Bijdragen tot de*  
567 *Taal-, Land-, en Volkenkunde*, (1ste Afl):120–139.
- 568 DeKeyser, R. M. (2000). The robustness of critical period effects in second language  
569 acquisition. *Studies in second language acquisition*, 22(4):499–533.
- 570 Dunn, M., Greenhill, S. J., Levinson, S. C., and Gray, R. D. (2011). Evolved struc-  
571 ture of language shows lineage-specific trends in word-order universals. *Nature*,  
572 473(7345):79–82.
- 573 Ember, C. R., Page, H., O’Leary, T., and Martin, M. (1992). Computerized concordance  
574 of cross-cultural samples. *New Haven, CT: Human Relations Area Files*.
- 575 Evans, N. (2010). Chapter 23. Semantic Typology. In Bakker, D., editor, *The Oxford*  
576 *handbook of linguistic typology*. Oxford: Oxford University Press.
- 577 Farber, B. (1975). Bilateral kinship: Centripetal and centrifugal types of organization.  
578 *Journal of Marriage and the Family*, pages 871–888.
- 579 Flom, P. L. and Cassell, D. L. (2007). Stopping stepwise: Why stepwise and similar  
580 selection methods are bad, and what you should use. In *NorthEast SAS Users*  
581 *Group Inc 20th Annual Conference: 11-14th November 2007; Baltimore, Maryland*.
- 582 Fritz, S. A. and Purvis, A. (2010). Selectivity in mammalian extinction risk and threat  
583 types: a new measure of phylogenetic signal strength in binary traits. *Conservation*  
584 *Biology*, 24(4):1042–1051.
- 585 Galison, P. and Daston, L. (2007). *Objectivity*. New York (NY): Zone Books.
- 586 Goody, J. (1970). Cousin terms. *Southwestern Journal of Anthropology*, 26(2):125–142.
- 587 Gray, R. D., Drummond, A. J., and Greenhill, S. J. (2009). Language phylogenies reveal  
588 expansion pulses and pauses in pacific settlement. *science*, 323(5913):479–483.
- 589 Grollemund, R., Branford, S., Bostoen, K., Meade, A., Venditti, C., and Pagel, M. (2015).  
590 Bantu expansion shows that habitat alters the route and pace of human dispersals.  
591 *Proceedings of the National Academy of Sciences*, 112(43):13296–13301.

- 592 Guillon, M. and Mace, R. (2016). A phylogenetic comparative study of bantu kinship  
593 terminology finds limited support for its co-evolution with social organisation. *PloS*  
594 *one*, 11(3):e0147920.
- 595 Henrich, J. (2004). Demography and cultural evolution: how adaptive cultural pro-  
596 cesses can produce maladaptive losses – the Tasmanian case. *American Antiquity*,  
597 69(2):197–214.
- 598 Henrich, J., Heine, S. J., and Norenzayan, A. (2010). Most people are not weird. *Nature*,  
599 466(7302):29–29.
- 600 Heyes, C. (2018). *Cognitive gadgets: the cultural evolution of thinking*. Harvard University  
601 Press.
- 602 Holden, C. J. and Mace, R. (2003). Spread of cattle led to the loss of matrilineal descent  
603 in Africa: a coevolutionary analysis. *Proceedings of the Royal Society of London B:*  
604 *Biological Sciences*, 270(1532):2425–2433.
- 605 Hudson Kam, C. L. and Newport, E. L. (2009). Getting it right by getting it wrong:  
606 When learners change languages. *Cognitive psychology*, 59(1):30–66.
- 607 Human Relations Area Files, Inc (2017). World Cultures Ethnography Database.  
608 <http://hraf.yale.edu/ehc>. Accessed: 2017-08-01.
- 609 Jordan, F. M. (2013). Comparative phylogenetic methods and the study of pattern and  
610 process in kinship. *Kinship systems: Change and reconstruction*, pages 43–58.
- 611 Kemp, C. and Regier, T. (2012). Kinship categories across languages reflect general  
612 communicative principles. *Science*, 336(6084):1049–1054.
- 613 Kirby, K. R., Gray, R. D., Greenhill, S. J., Jordan, F. M., Gomes-Ng, S., Bibiko, H.-  
614 J., Blasi, D. E., Botero, C. A., Bower, C., Ember, C. R., et al. (2016). D-place:  
615 A global database of cultural, linguistic and environmental diversity. *PLoS One*,  
616 11(7):e0158391.
- 617 Köbben, A. J., Verrips, J., and Brunt, L. (1974). Lévi-Strauss and empirical inquiry.  
618 *Ethnology*, pages 215–223.
- 619 Levinson, S. C. (2012). The original sin of cognitive science. *Topics in cognitive science*,  
620 4(3):396–403.
- 621 Lupyan, G. and Dale, R. (2010). Language structure is partly determined by social  
622 structure. *PloS one*, 5(1):e8559.

- 623 Mace, R. and Pagel, M. (1994). A latitudinal gradient in the density of human languages  
624 in north america. *Proc. R. Soc. Lond. B*, 261(1360):117–121.
- 625 Malt, B. C. and Majid, A. (2013). How thought is mapped into words. *Wiley Interdisci-*  
626 *plinary Reviews: Cognitive Science*, 4(6):583–597.
- 627 Maye, J. and Weiss, D. (2003). Statistical cues facilitate infants’ discrimination of difficult  
628 phonetic contrasts. In *Proceedings of the 27th annual Boston University conference*  
629 *on language development*, volume 2, pages 508–518.
- 630 Maye, J., Werker, J. F., and Gerken, L. (2002). Infant sensitivity to distributional infor-  
631 mation can affect phonetic discrimination. *Cognition*, 82(3):B101–B111.
- 632 Mitchell, A. (2016). Words that smell like father-in-law: A linguistic description of the  
633 Datooga avoidance register. *Anthropological Linguistics*, 57(2):195–217.
- 634 Morgan, L. H. (1871). *Systems of consanguinity and affinity of the human family*, volume  
635 218. Smithsonian institution.
- 636 Murdock, G. P. (1947). Bifurcate merging, a test of five theories. *American Anthropologist*,  
637 49(1):56–68.
- 638 Murdock, G. P. (1949). *Social structure*. London: Macmillan.
- 639 Murdock, G. P. (1967). Ethnographic atlas: a summary. *Ethnology*, 6(2):109–236.
- 640 Murdock, G. P. and White, D. R. (1969). Standard cross-cultural sample. *Ethnology*,  
641 8(4):329–369.
- 642 Nettle, D. (2012). Social scale and structural complexity in human languages. *Phil.*  
643 *Trans. R. Soc. B*, 367(1597):1829–1836.
- 644 Nimkoff, M. F. (1965). *Types of Family and the Social System and the Family*, pages  
645 12–60. Houghton Mifflin, Boston.
- 646 Parkin, D. (1997). *Kinship: an introduction to the basic concepts*. Wiley-Blackwell.
- 647 Pryor, F. L. (2005). *Economic Systems of Foraging, Agricultural, and Industrial Societies*.  
648 Cambridge University Press.
- 649 R Core Team (2016). *R: A Language and Environment for Statistical Computing*. R  
650 Foundation for Statistical Computing, Vienna, Austria.
- 651 Rácz, P., Hay, J. B., and Pierrehumbert, J. B. (2017). Social salience discriminates  
652 learnability of contextual cues in an artificial language. *Frontiers in psychology*, 8.



- 653 Reali, F., Chater, N., and Christiansen, M. H. (2018). Simpler grammar, larger vocab-  
654 ularly: How population size affects language. In *Proceedings of the Royal Society B*,  
655 volume 285, page 20172586. The Royal Society.
- 656 Regier, T. and Kay, P. (2009). Language, thought, and color: Whorf was half right.  
657 *Trends in cognitive sciences*, 13(10):439–446.
- 658 Sinnemäki, K. and Di Garbo, F. (2018). Language structures may adapt to the sociolin-  
659 guistic environment, but it matters what and how you count: A typological study of  
660 verbal and nominal complexity. *Frontiers in psychology*, 9.
- 661 Song, J., Bender, A., and Beller, S. (2009). Conditional promises and threats in germany,  
662 china, and tonga: cognition and emotion. *Journal of Cognition and Culture*, 9(1-  
663 2):115–139.
- 664 Tomasello, M. (2009). *Constructing a language*. Boston (Ma): Harvard university press.
- 665 Walker, R. S., Beckerman, S., Flinn, M. V., Gurven, M., von Rueden, C., Kramer, K. L.,  
666 Greaves, R. D., Cordoba, L., Villar, D., Hagen, E. H., Koster, J. M., Sugiyama, L.,  
667 Hunter, T. E., and Hill, K. (2013). Living with kin in lowland horticultural societies.  
668 *Current Anthropology*, 54(1):96–103.
- 669 Wickham, H. (2009). *ggplot2: Elegant Graphics for Data Analysis*. New York (Ny):  
670 Springer.
- 671 Wood, S. (2006). *Generalized additive models: an introduction with R*. Boca Raton (Fl):  
672 CRC press.
- 673 Wood, S. N., Pya, N., and Säfken, B. (2016). Smoothing parameter and model selec-  
674 tion for general smooth models. *Journal of the American Statistical Association*,  
675 111(516):1548–1563.

## 676 **Appendix: Coding of Ethnographic Atlas variables**

677 For details, see <https://github.com/petyaracz/RaczPassmoreJordan2018>.

| EA variable | name                | EA code: coding used in paper                                                                       | type in paper |
|-------------|---------------------|-----------------------------------------------------------------------------------------------------|---------------|
| EA015       | marriage types      | 1,2: endogamous; 3: agamous; 4,5,6: exogamous                                                       | factor        |
| EA023       | cousin marriage     | 7,8: 1; 11,12: 2; 1,2,3,4,5,6,9,13: 3; 10, 4                                                        | ordered       |
| EA027       | cousin type         | 4: hawaiian; 3: eskimo; 5: iroquois; 1,6: crow/omaha; 7,2: sudanese/descriptive                     | ordered       |
| EA031       | community size      |                                                                                                     | ordered       |
| EA030       | settlement patterns |                                                                                                     | ordered       |
| EA032       | local jurisdiction  |                                                                                                     | ordered       |
| EA033       | jurisdiction        |                                                                                                     | ordered       |
| EA042       | subsistence         | 7: intensive agriculture; 5,6,9: extensive agriculture; 4: pastoralism; 1,2,3: foraging             | factor        |
| EA043       | descent type        | 1: patrilineal; 6,4: bilateral/quasi-lineages; 3: matrilineal, 2,5: duolateral/ambilineal; 7: mixed | factor        |
| EA202       | population size     |                                                                                                     | numeric       |

678
